# Supplementary material
Source: publisher site journal article supplement (https://www.dovepress.com/article/429758)
Supplement: Supplementary file 1 [file get_supplementary_file.php]

**Appendix 1: List of residency choices available in Qatar**

Anatomic Pathology

Anesthesia

Cardiothoracic Surgery

Clinical Radiology

Community Medicine

Dermatology

Emergency Medicine

ENT (Otorhinolaryngology)

Family Medicine

General Surgery

Internal Medicine

Neurology

Neurosurgery

Obstetrics & Gynecology

Ophthalmology

Orthopedics

Pediatrics

Plastic Surgery

Psychiatry and Mental Health

Urology

**Appendix 2: Thematic classification of determining factors**

**1. Lifestyle and Work life balance**

**•** Predictable working hours

• Better quality of life

• Work life balance

**2. Societal obligation**

•My community needs this type of specialist

**3. Prestige & income**

• Prestigious specialty

• Financial reasons

**4. Place of practice**

•Private practice

• Proximity to family/friends

• Hospital based practice

• Community based practice

• Desire to live in an Arabic speaking/Islamic environment

• Ability to obtain visa/work permit status

• Geographical location

• Potential to study/work abroad

• Better opportunities for job/residency

**5. Scope of practice**

•Prefer teaching or other non-clinical educational experience

• Prefer to work within a team

• Interesting patients and scope of practice

• Limited patient contact

• Type of patient contact

• Exciting practice

• Interesting field to study or practice

• Intellectually challenging

**6. Role models and university influence**

•A relative of mine does this specialty and encouraged me

• Encouraged by a mentor or teacher

• Influential elective/clerkship experience

• Advice/influence from family and friends

• Social media influence
